# Supplementary material for: Multi-channel portable odor delivery device for self-administered and rapid smell testing
Source: PubMed Central journal article supplement (PMC11470141; doi:10.1038/s44172-024-00286-1), 2024-10-11
Supplement: 44172_2024_286_MOESM3_ESM.pdf [file 44172_2024_286_MOESM3_ESM.pdf]

# Description of Additional Supplementary Files

**File name:** Supplementary Data 1

**Description:** Cost breakdown. Data showing the cost of the different system components making up the odor delivery device.

**File name:** Supplementary Data 2

**Description:** Source Data for Figures 2 and 3.
